# Supplementary material for: A Comparative Study of Periodontal Health Status between International and Domestic University Students in Japan
Source: MDPI journal article supplement (doi:10.3390/ijerph20053866), 2023-02-22
Supplement: s1 [file s1]

Table S1

|          | All   |       |        | Domestic students |       |        | International students |       |        |
|----------|-------|-------|--------|-------------------|-------|--------|------------------------|-------|--------|
|          | All   | Male  | Female | All               | Male  | Female | All                    | Male  | Female |
| n        | 231   | 154   | 77     | 152               | 118   | 34     | 79                     | 36    | 43     |
| BOP (%)  | 39.39 | 38.96 | 40.26  | 34.21             | 38.14 | 20.59  | 49.37                  | 41.67 | 55.81  |
| CGS      | 1.51  | 1.55  | 1.45   | 1.43              | 1.46  | 1.32   | 1.68                   | 1.83  | 1.56   |
| PPD (mm) | 1.68  | 1.67  | 1.70   | 1.64              | 1.66  | 1.55   | 1.77                   | 1.70  | 1.82   |

Table S2

|          | All  |      | Domestic students |      | International students |      |
|----------|------|------|-------------------|------|------------------------|------|
| BOP      | (+)  | (-)  | (+)               | (-)  | (+)                    | (-)  |
| PPD (mm) | 1.98 | 1.49 | 1.93              | 1.48 | 2.05                   | 1.49 |
